# Supplementary material for: Protective role of fructokinase blockade in the pathogenesis of acute kidney injury in mice
Source: PubMed Central journal article supplement (PMC5316807; doi:10.1038/ncomms14181), 2017-02-13
Supplement: ncomms14181-s1.pdf [file ncomms14181-s1.pdf]

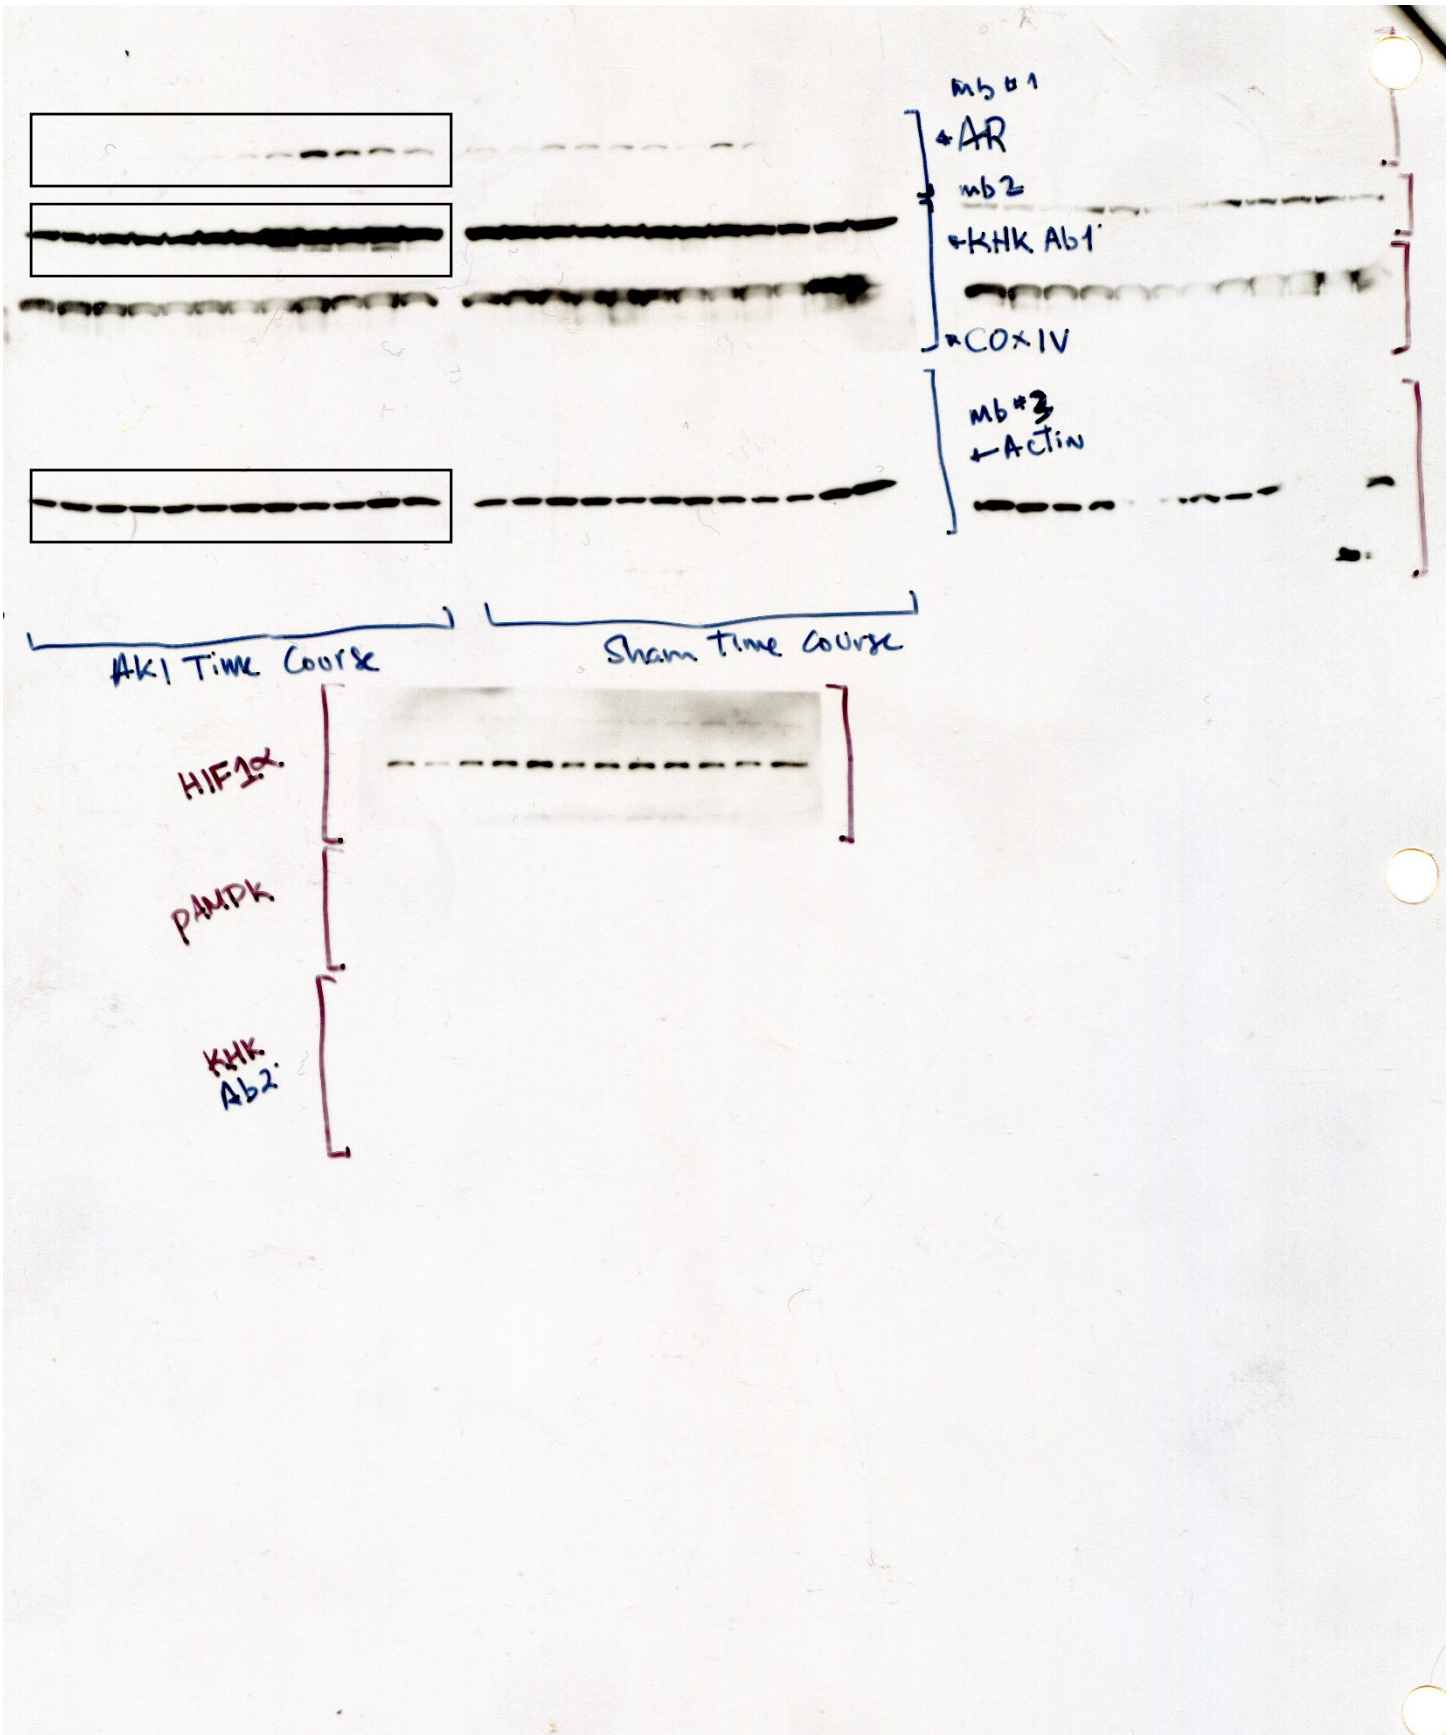

Supplementary figure 1. Whole film for western blot in figure 1



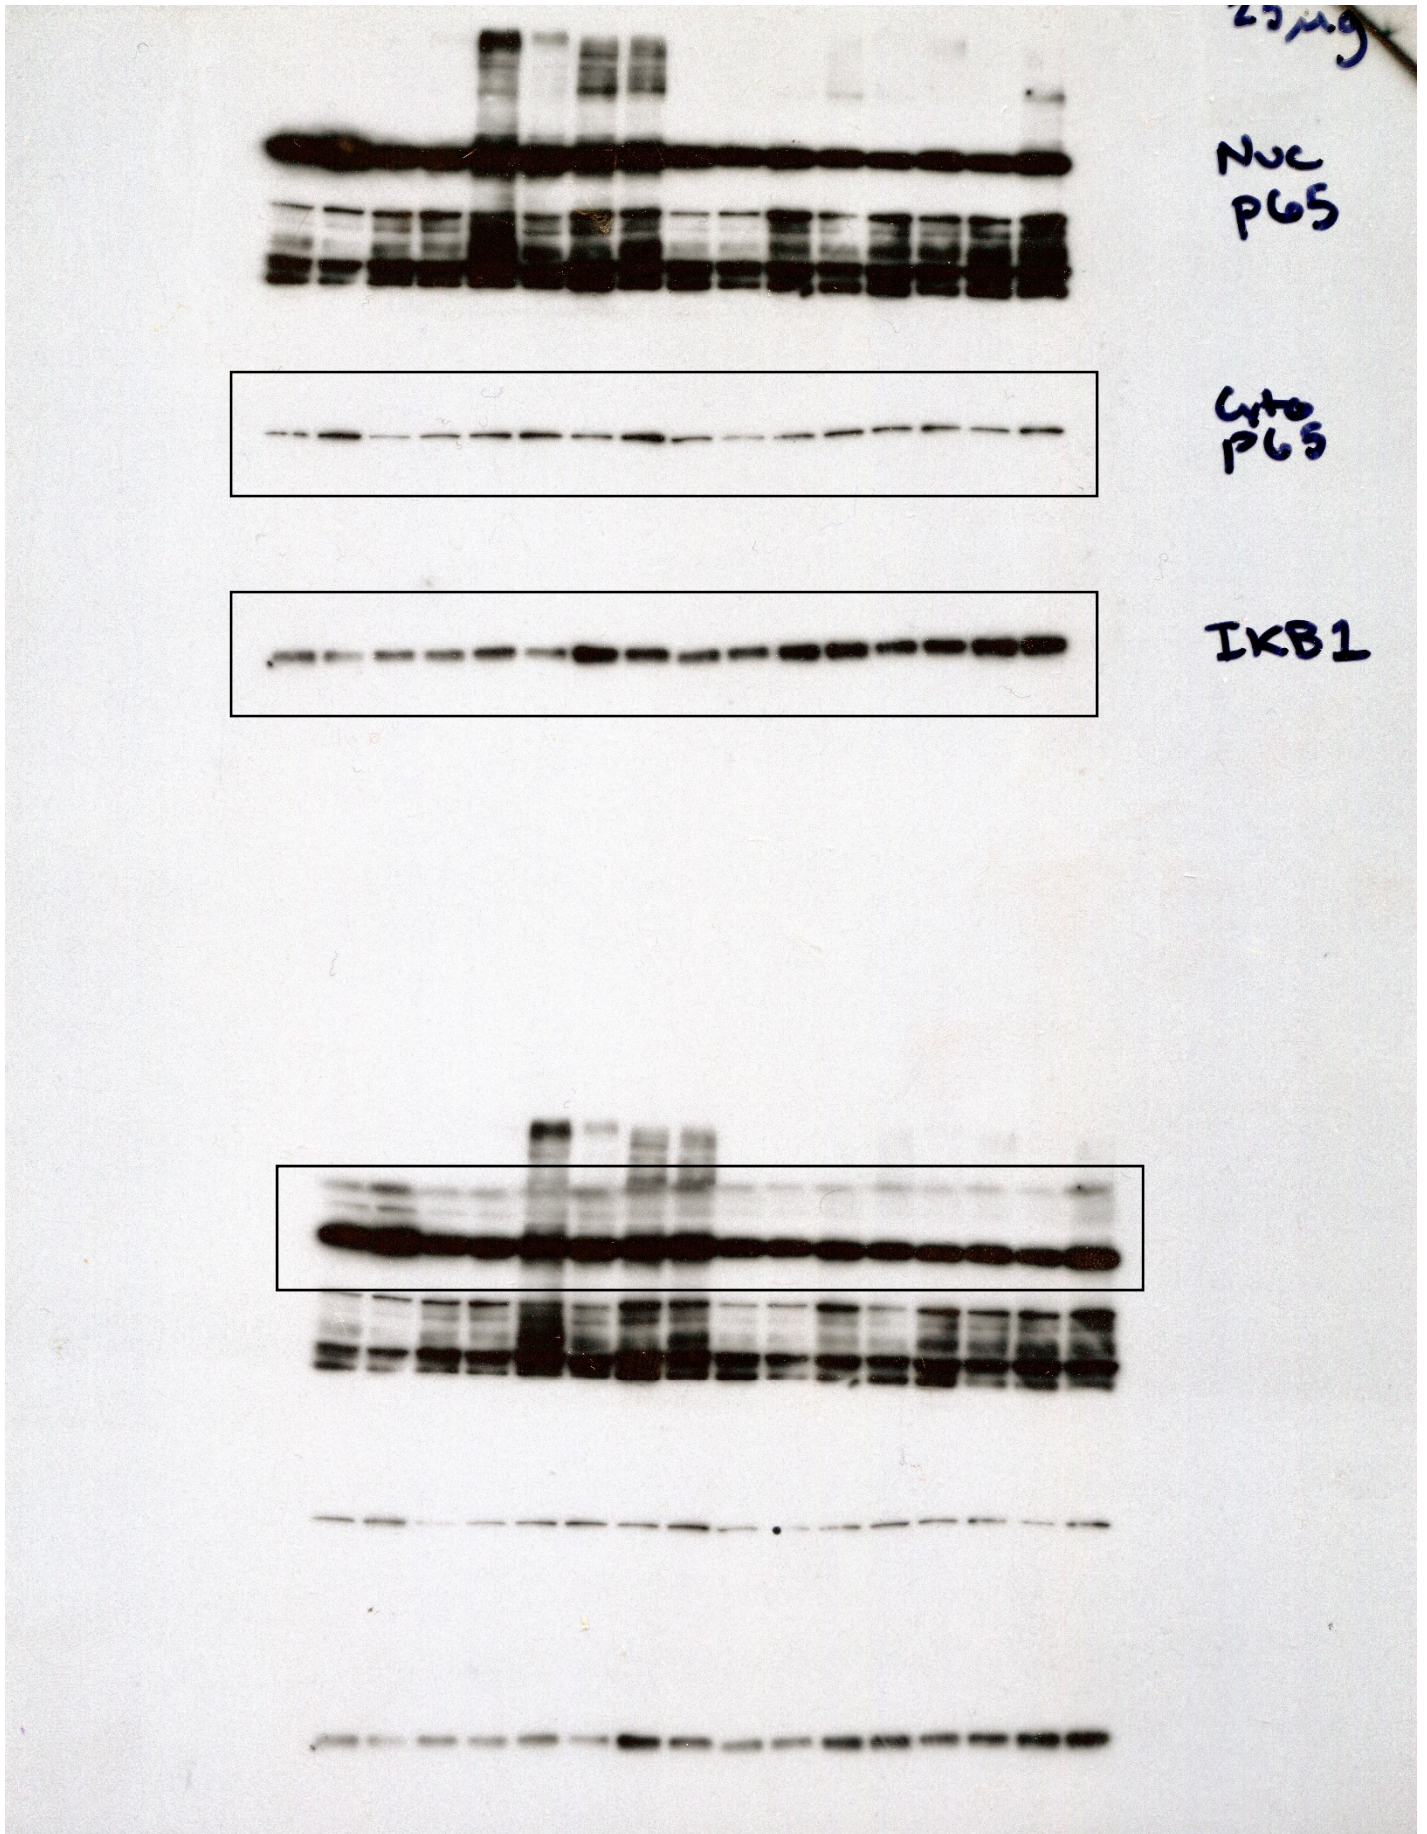

Supplementary figure 2. Whole film for western blot in figure 7
